# Supplementary material for: Chromosomics: Bridging the Gap between Genomes and Chromosomes
Source: Genes (Basel). 2019 Aug 20;10(8):627. doi: 10.3390/genes10080627 (PMC6723020; doi:10.3390/genes10080627)
Supplement: Supplementary file 1 [file genes-10-00627-s001.pdf]

# Supplementary Material

**Table 1.** Examples of research questions answered with a chromosomics approach.

| Research Question                                      | Why chromosomics was needed?                                                                                 | Approach                                                                                                                                                       | Answer to research question                                                                                                                                                   | References |
|--------------------------------------------------------|--------------------------------------------------------------------------------------------------------------|----------------------------------------------------------------------------------------------------------------------------------------------------------------|-------------------------------------------------------------------------------------------------------------------------------------------------------------------------------|------------|
| Does <i>XIST</i> exist in marsupials?                  | Poor sequence conservation of <i>XIST</i> across species                                                     | Mapping of flanking genes and re-examination of genome sequence                                                                                                | <i>Xist</i> does not exist<br>Led to discovery <i>Rsx</i>                                                                                                                     | [1–3]      |
| What causes Fragile X syndrome (mental retardation)?   | It started with the observation that many mentally retarded boys had X chromosome with gap in long arm       | Identification of region stretched out in affected boys, mapping wrt DNA markers, positional cloning and sequencing of gene, identification of triplet repeats | Led to discovery of <i>FMR1</i> gene, and triplet repeat mutations                                                                                                            | [4,5]      |
| What causes Bloom’s Syndrome?                          | Diagnosis of chromosome fragility and cancer susceptibility by high frequency of sister chromatic exchange   | Positional cloning, cDNA’s of genes in interval                                                                                                                | Led to discovery of DNA repair pathways                                                                                                                                       | [6,7]      |
| What causes Tasmanian devil tumour disease?            | Started with the demonstration that tumours from unrelated affected animals had the same abnormal karyotype. | ID of abnormal chromosomes by mapping, transcriptomics, genome sequencing and ID of candidate genes from breakpoints                                           | Led to discovery of transmissible tumour, management implications                                                                                                             | [8–10]     |
| How did centromeres emerge during mammalian evolution? | Poor sequence information due to their association to repetitive DNA                                         | Comparative mapping of flanking markers                                                                                                                        | Description of evolutionary “neocentromeres” and the “centromere repositioning” effect.<br>Led to discovery of<br>- functional satellite-free centromeres<br>- centric shifts | [11–14]    |

|                                                                             |                                                                                                                            |                                                                                                                                                                                          |                                                                                                                                            |         |
|-----------------------------------------------------------------------------|----------------------------------------------------------------------------------------------------------------------------|------------------------------------------------------------------------------------------------------------------------------------------------------------------------------------------|--------------------------------------------------------------------------------------------------------------------------------------------|---------|
|                                                                             |                                                                                                                            |                                                                                                                                                                                          | - Robertsonian fusions (never detect with genomic sequencing – cause sterility in humans but also cause speciation)                        |         |
| How to cost-effectively produce chromosome-based assemblies?                | Sequencing is easy and cheap but assembling to chromosome-level requires mapping data that is time consuming and expensive | Used comparative genomics to identify predicted chromosome fragments.<br>Developed universal probe set<br>Used high-throughput ,cross species, multi-hybridisation approach.             | Chromosome level assembly of pigeon and peregrine falcon genome.<br>Development of an approach that could be used for any animal genome.   | [15]    |
| Are mobile elements involved in epigenetic programs such as X inactivation? | To link the location of LINE elements to the X chromosome during X inactivation                                            | Used RNA and DNA FISH of LINE elements on X chromosomes                                                                                                                                  | Linked LINE element involvement during XCI                                                                                                 | [16]    |
| Where are ribosomal DNA (rDNA) loci located?                                | Development of “universal” probes for cytogenetic comparisons between species.                                             | Conserved regions of rDNA genes used as probes for DNA FISH hybridise to chromosomes from divergent taxa, enabling an initial comparative analysis of karyotypes from different species. | Databases on the location of rDNA genes in animals and plants have been established, enabling karyotype comparisons across divergent taxa. | [17,18] |
| Where and what are the features of hotspots for meiotic recombination?      | Recombination hotspots are influenced by chromatin structure therefore a combined sequence, epigenomic and cytogenetic     | Initial studies used electron microscopy to study synaptonemal complexes for recombination nodules, followed                                                                             | Features of recombination hotspots in eukaryotes, such as nucleosome-depleted region, chromatin                                            | [19–21] |

|  |                                                |                                                                                                                                      |                                                 |  |
|--|------------------------------------------------|--------------------------------------------------------------------------------------------------------------------------------------|-------------------------------------------------|--|
|  | approach is required to uncover these regions. | more recently by chromatin immunoprecipitation and sequencing of purified regions associated with double strand breaks and cohesins. | accessibility and transcription factor binding. |  |
|--|------------------------------------------------|--------------------------------------------------------------------------------------------------------------------------------------|-------------------------------------------------|--|

### References:

- Davidow, L.S.; Breen, M.; Duke, S.E.; Samollow, P.B.; McCarrey, J.R.; Lee, J.T. The search for a marsupial XIC reveals a break with vertebrate synten. *Chromosom. Res.* **2007**, *15*, 137–146.
- Hore, T.A.; Koina, E.; Wakefield, M.J.; Marshall Graves, J.A. The region homologous to the X-chromosome inactivation centre has been disrupted in marsupial and monotreme mammals. *Chromosom. Res.* **2007**, *15*, 147–161.
- Shevchenko, A.I.; Zakharova, I.S.; Elisaphenko, E.A.; Kolesnikov, N.N.; Whitehead, S.; Bird, C.; Ross, M.; Weidman, J.R.; Jirtle, R.L.; Karamysheva, T. V.; et al. Genes flanking Xist in mouse and human are separated on the X chromosome in American marsupials. *Chromosom. Res.* **2007**, *15*, 127–136.
- Lubs, H.A. A marker X chromosome. *Am. J. Hum. Genet.* **1969**, *21*, 231–44.
- Nolin, S.L.; Brown, W.T.; Glicksman, A.; Houck, G.E.; Gargano, A.D.; Sullivan, A.; Biancalana, V.; Brøndum-Nielsen, K.; Hjalgrim, H.; Holinski-Feder, E.; et al. Expansion of the fragile X CCG repeat in females with premutation or intermediate alleles. *Am. J. Hum. Genet.* **2003**, *72*, 454–464.
- Chaganti, R.S.K.; Schonberg, S.; German, J. A Manyfold Increase in Sister Chromatid Exchanges in Bloom's Syndrome Lymphocytes. *Proc. Natl. Acad. Sci.* **1974**, *71*, 5408–5412.
- Ellis, N.A.; Groden, J.; Ye, T.Z.; Straughen, J.; Lennon, D.J.; Ciocchi, S.; Proytcheva, M.; German, J. The Bloom's syndrome gene product is homologous to RecQ helicases. *Cell* **1995**, *83*, 655–666.
- Deakin, J.E.; Bender, H.S.; Pearse, A.-M.; Rens, W.; O'Brien, P.C.M.; Ferguson-Smith, M.A.; Cheng, Y.; Morris, K.; Taylor, R.; Stuart, A.; et al. Genomic restructuring in the Tasmanian devil facial tumour: Chromosome painting and gene mapping provide clues to evolution of a transmissible tumour. *PLoS Genet.* **2012**, *8*, e1002483.
- Murchison, E.P.; Tovar, C.; Hsu, A.; Bender, H.S.; Kheradpour, P.; Rebbeck, C.A.; Obendorf, D.; Conlan, C.; Bahlo, M.; Blizzard, C.A.; et al. The Tasmanian devil transcriptome reveals Schwann cell origins of a clonally transmissible cancer. *Science* **2010**, *327*, 84–87.
- Taylor, R.L.; Zhang, Y.; Schöning, J.P.; Deakin, J.E. Identification of candidate genes for devil facial tumour disease tumorigenesis. *Sci. Rep.* **2017**, *7*, 8761.
- Piras, F.M.; Nergadze, S.G.; Magnani, E.; Bertoni, L.; Attolini, C.; Khorauli, L.; Raimondi, E.; Giulotto, E. Uncoupling of satellite DNA and centromeric function in the genus *Equus*. *PLoS Genet.* **2010**, *6*, e1000845.
- Carbone, L.; Nergadze, S.G.; Magnani, E.; Misceo, D.; Francesca Cardone, M.; Roberto, R.; Bertoni, L.; Attolini, C.; Francesca Piras, M.; de Jong, P.; et al. Evolutionary movement

of centromeres in horse, donkey, and zebra. *Genomics* **2006**, *87*, 777–782.

13. Ventura, M.; Archidiacono, N.; Rocchi, M. Centromere emergence in evolution. *Genome Res.* **2001**, *11*, 595–599.
14. Montefalcone, G.; Tempesta, S.; Rocchi, M.; Archidiacono, N. Centromere repositioning. *Genome Res.* **1999**, *9*, 1184–1188.
15. Damas, J.; O'Connor, R.; Farré, M.; Lenis, V.P.E.; Martell, H.J.; Mandawala, A.; Fowler, K.; Joseph, S.; Swain, M.T.; Griffin, D.K.; et al. Upgrading short read animal genome assemblies to chromosome level using comparative genomics and a universal probe set. *Genome Res.* **2017**, *27*, 875–884.
16. Chow, J.C.; Ciaudo, C.; Fazzari, M.J.; Mise, N.; Servant, N.; Glass, J.L.; Attreed, M.; Avner, P.; Wutz, A.; Barillot, E.; et al. LINE-1 activity in facultative heterochromatin formation during X chromosome inactivation. *Cell* **2010**, *141*, 956–969.
17. Sochorová, J.; Garcia, S.; Gálvez, F.; Symonová, R.; Kovařík, A. Evolutionary trends in animal ribosomal DNA loci: Introduction to a new online database. *Chromosoma* **2018**, *127*, 141–150.
18. Garcia, S.; Garnatje, T.; Kovařík, A. Plant rDNA database: Ribosomal DNA loci information goes online. *Chromosoma* **2012**, *121*, 389–394.
19. Dluzewska, J.; Szymanska, M.; Ziolkowski, P.A. Where to Cross Over? Defining crossover sites in plants. *Front. Genet.* **2018**, *9*, 609.
20. Tock, A.J.; Henderson, I.R. Hotspots for Initiation of Meiotic Recombination. *Front. Genet.* **2018**, *9*, 521.
21. Vara, C.; Paytuví-Gallart, A.; Cuartero, Y.; Le Dily, F.; Garcia, F.; Salvà-Castro, J.; Gómez-H, L.; Julià, E.; Moutinho, C.; Aiese Cigliano, R.; et al. Three-Dimensional genomic structure and cohesin occupancy correlate with transcriptional activity during spermatogenesis. *Cell Rep.* **2019**, *28*, 352–367.
